# Supplementary material for: A rapid method for detection of five known mutations associated with aminoglycoside-induced deafness
Source: Springer Nature journal article supplement (doi:10.1186/1471-2350-10-2), 2009-01-13
Supplement: 12881_2008_416_MOESM3_ESM.pdf [file 12881_2008_416_MOESM3_ESM.pdf]

**A1555G**

|         |                           |
|---------|---------------------------|
| Human   | TATATAGAGGAGACAAGTCGTAACA |
| Chimp   | TATATAGAGGAGATAAGTCGTAACA |
| Gorilla | TATATAGAGGAGATAAGTCGTAACA |
| Mouse   | TAT-GAGAGGAGATAAGTCGTAACA |
| Rat     | TAT-GAGAGGAGATAAGTCGTAACA |
| Dog     | ACACAAGAGGAGACAAGTCGTAACA |
| Cow     | ACATGAGAGGAGACAAGTCGTAACA |

\*\*\*\*\*

**A827G**

|         |                           |
|---------|---------------------------|
| Human   | CAGCAGTGATTAACTTTAGCAATA  |
| Chimp   | CAGCAGTGATAAACTTTAGCAATA  |
| Gorilla | CAGCAGTGATTAACTTTAGCAATA  |
| Mouse   | CAGCAGTGATAAATATTAAGCAATA |
| Rat     | CAGCAGTGATAAATATTAAGCAATG |
| Dog     | CAGCAGTGATAAAAATTAAGCCATA |
| Cow     | CAGCAGTGACAAAATTAAGCCATA  |

\*\*\*\*\* \*\* \*\* \*\* \*

**961delT+C(n)**

|         |                              |
|---------|------------------------------|
| Human   | TTAGATCACCCCTCCCCAATAAAGCT   |
| Chimp   | TTAGATCA----CCCCCATAAAGCT    |
| Gorilla | TTAGATCA----ATCCCCAATAAAGCT  |
| Mouse   | AACTATAA---ATAAATAAATAGAATT  |
| Rat     | AACTATAA---ATCTCATAAATAGAATT |
| Dog     | CAAGATAC----TTTTACTAAAGTT    |
| Cow     | AAAGCACC----ATACCAAATAGGGTT  |

\*\* \*

**T1095C**

|         |                            |
|---------|----------------------------|
| Human   | CCCCTACTATGCTTAGCCCTAAACCT |
| Chimp   | CCCCTACTATGCTTAGCCCTAAACTT |
| Gorilla | CCCCTACTATGCTTAGCCCTAAACTT |
| Mouse   | CCCCTACTATGCTTAGCCATAAACCT |
| Rat     | CCCCTACTATGCTTAGCCCTAAACCT |
| Dog     | CCCCTACTATGCTTAGCCCTAAACAT |
| Cow     | CCCCTACTATGCTTAGCCCTAAACAC |

\*\*\*\*\* \*\*\*\*\*

**C1494T**

|         |                           |
|---------|---------------------------|
| Human   | ACCGCCCGTCACCCTCCTCAAGT-A |
| Chimp   | ACCGCCCGTCACCCTCCTCAAGT-A |
| Gorilla | ACCGCCCGTCACCCTCCTCAAGT-A |
| Mouse   | ACCGCCCGTCACCCTCCTCAAATTA |
| Rat     | ACCGCCCGTCACCCTCCTCAAATTA |
| Dog     | ACCGCCCGTCACCCTCCTCAAGT-A |
| Cow     | ACCGCCCGTCACCCTCCTCAAAT-A |

\*\*\*\*\* \*\*\*\*\* \*
