# Supplementary figures and images for: A rapid method for detection of five known mutations associated with aminoglycoside-induced deafness
Source: Springer Nature journal article supplement (doi:10.1186/1471-2350-10-2), 2009-01-13

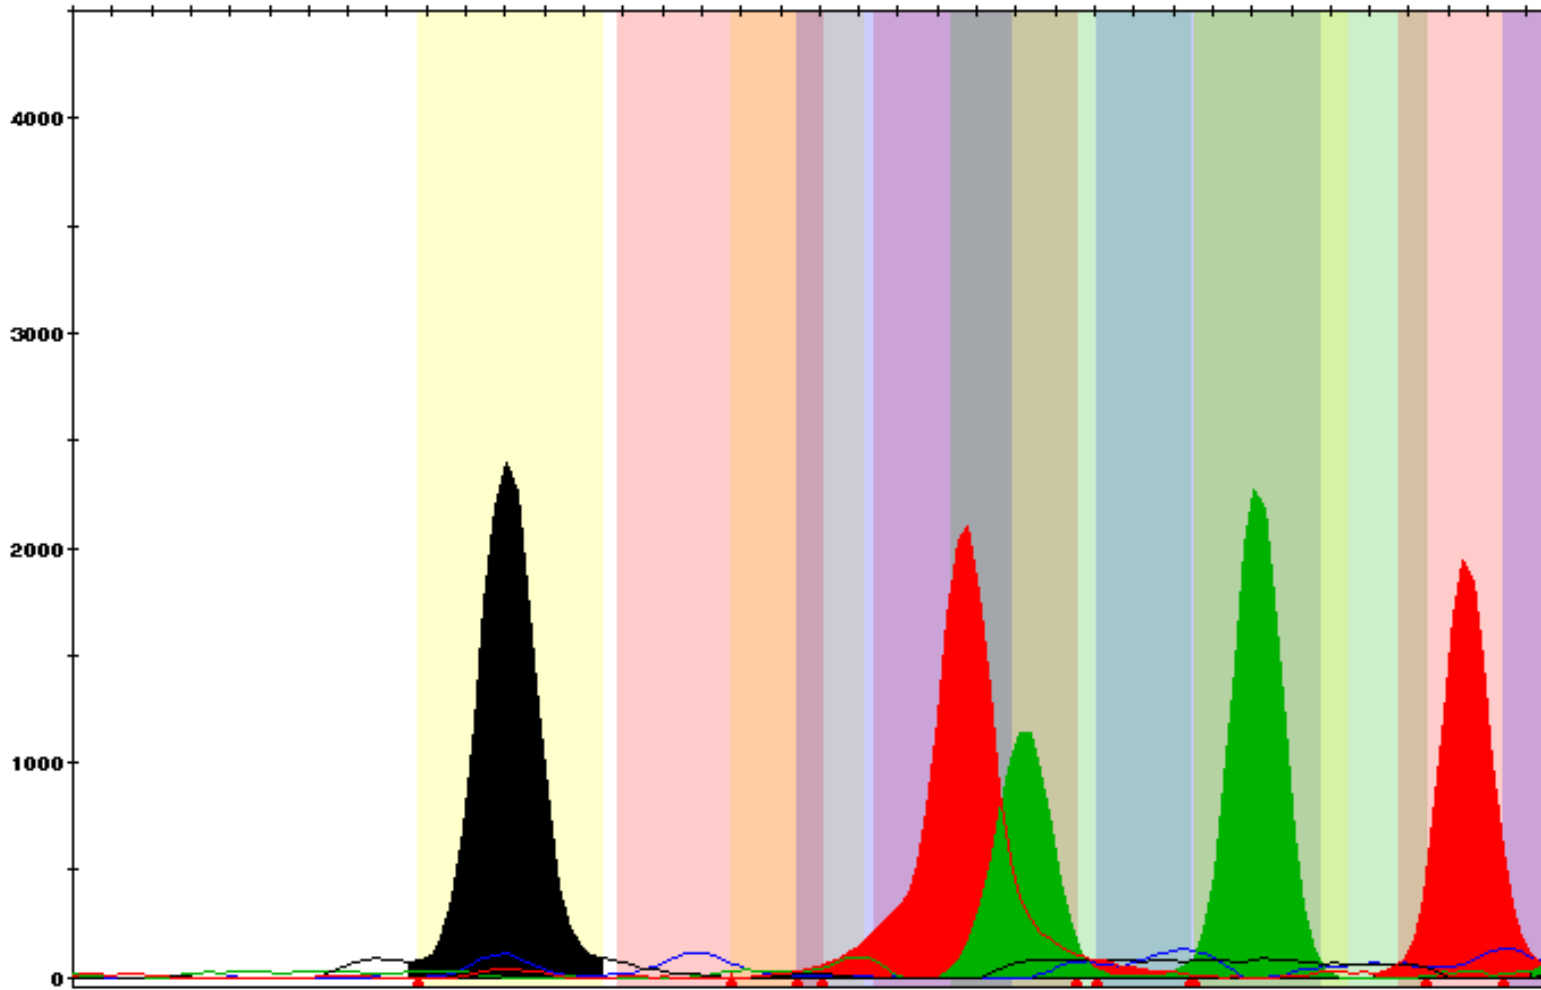

Locus:

1494

1095

1555

961

827

Allele present:

C

T

A

T\*

A\*

Supplement: 12881_2008_416_MOESM1_ESM.pdf [file 12881_2008_416_MOESM1_ESM.pdf]

T deleted and a series of C's inserted

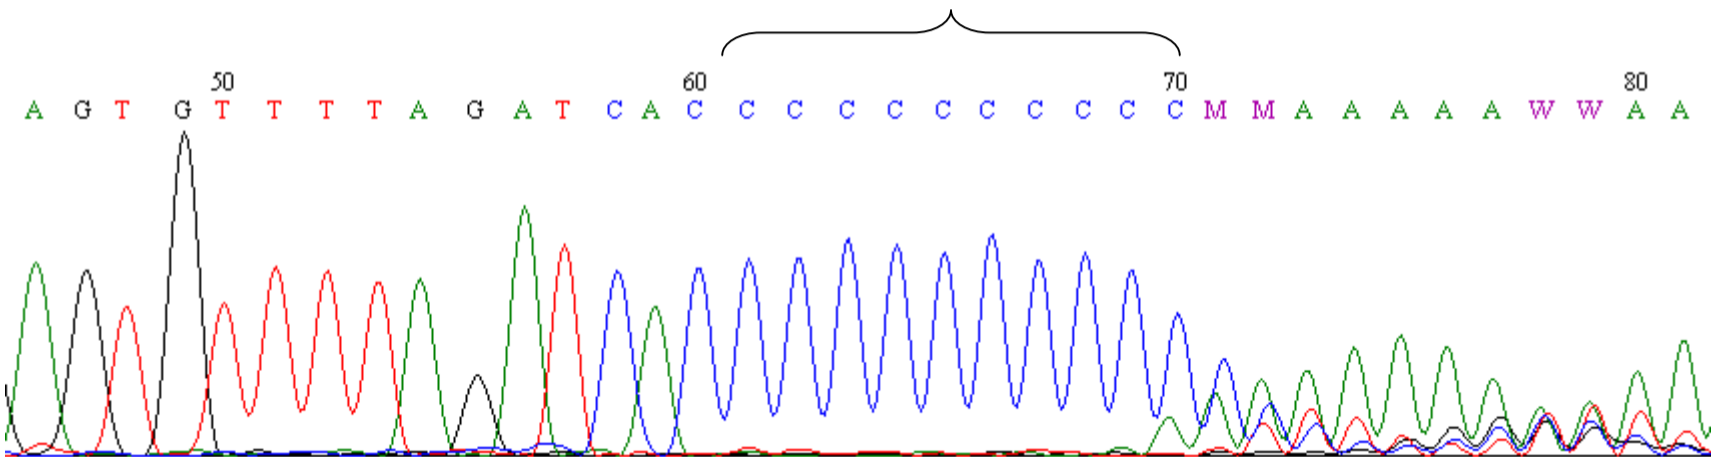

Supplement: 12881_2008_416_MOESM4_ESM.pdf [file 12881_2008_416_MOESM4_ESM.pdf]
